# Supplementary material for: Identifying the local structural units in La0.5Ba0.5MnO2.5 and BaY0.25Fe0.75O2.5 through the neutron pair distribution function
Source: Royal Society of Chemistry journal article supplement (doi:10.1039/c6dt04291k), 2016-12-24
Supplement: c6dt04291k1.pdf [file c6dt04291k1.pdf]

**Supporting Information for:**

**Identifying the Local Structural Units in  $\text{La}_{0.5}\text{Ba}_{0.5}\text{MnO}_{2.5}$  and  $\text{BaY}_{0.25}\text{Fe}_{0.75}\text{O}_{2.5}$   
through the Neutron Pair Distribution Function**

Graham King,<sup>1</sup> Corey M. Thompson,<sup>2,3</sup> Kun Luo,<sup>4</sup> John E. Greedan,<sup>3</sup>, Michael A. Hayward<sup>4</sup>

<sup>1</sup> *Materials Science and Technology Division, Los Alamos National Laboratory, Los Alamos, NM 87545, USA*

<sup>2</sup> *Department of Chemistry, Purdue University, 560 Oval Drive, West Lafayette, IN 47907, USA*

<sup>3</sup> *Department of Chemistry and Brockhouse Institute of Materials Research, McMaster University, Hamilton, ON, L8S 4M1, Canada*

<sup>4</sup> *Department of Chemistry, University of Oxford, Inorganic Chemistry Laboratory, South Parks Road, Oxford, OX1 3QR, United Kingdom*

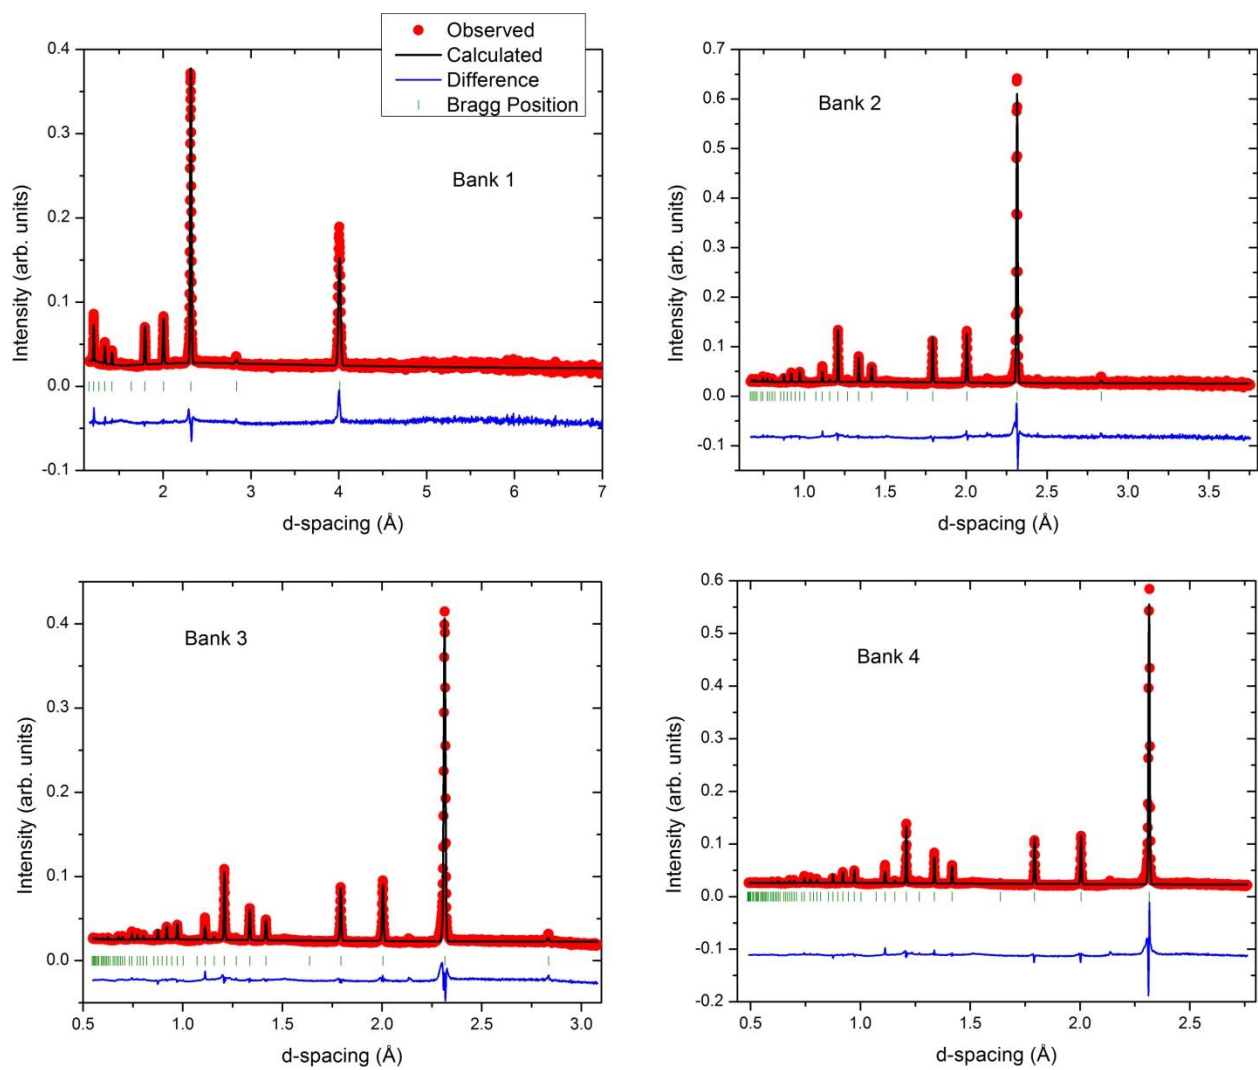

**Figure S1.** Rietveld refinement of the powder neutron diffraction pattern of  $\text{La}_{0.5}\text{Ba}_{0.5}\text{MnO}_{2.5}$ .

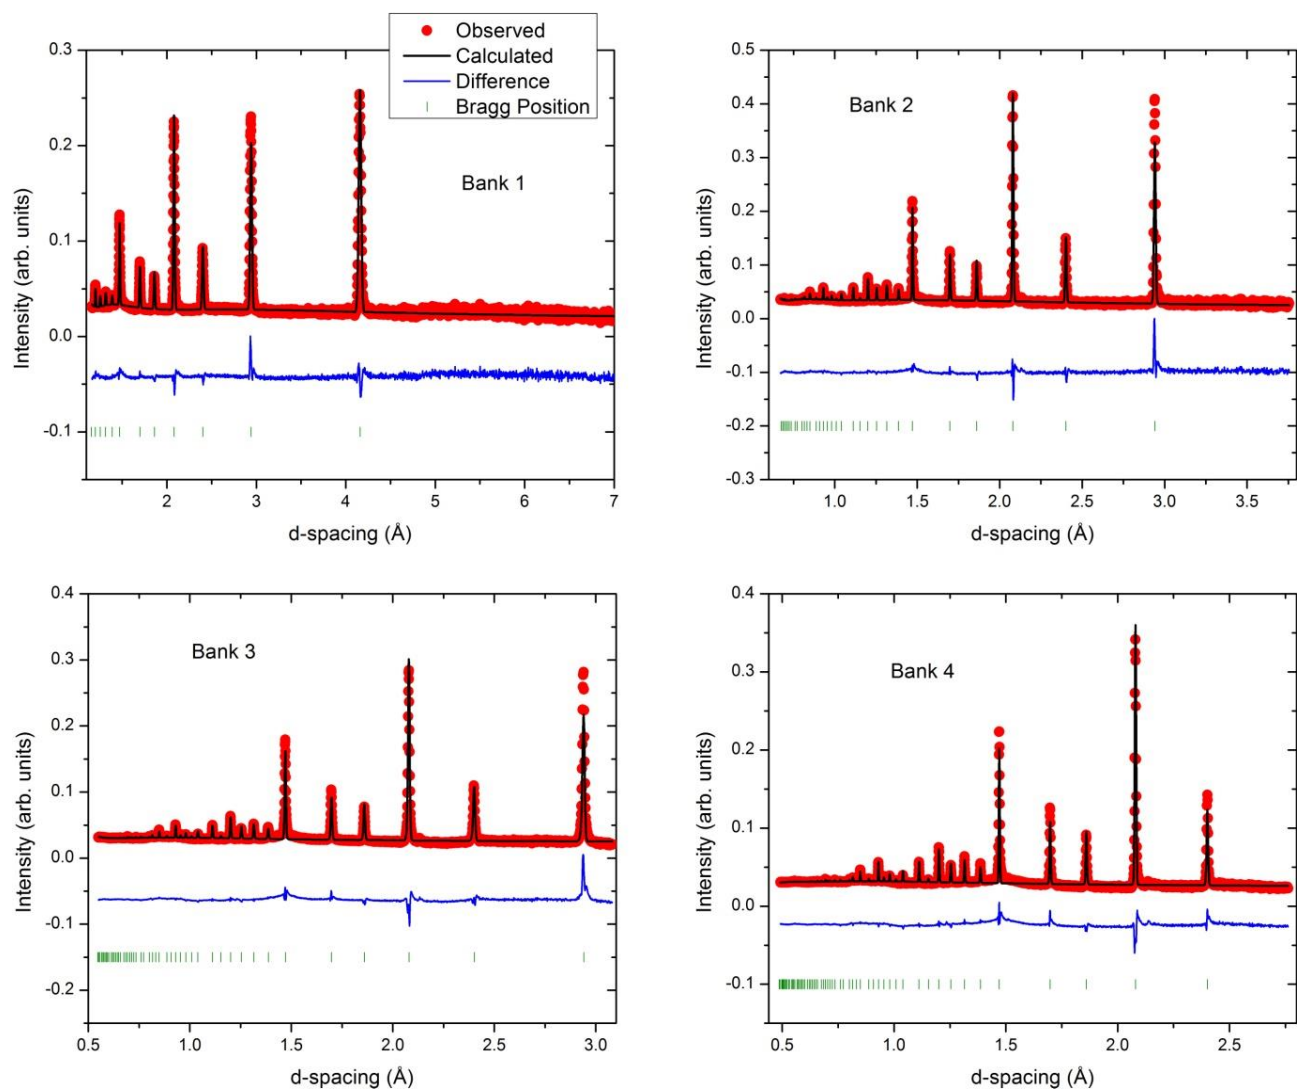

**Figure S2.** Rietveld refinement of the powder neutron diffraction pattern of  $\text{BaY}_{0.25}\text{Fe}_{0.75}\text{O}_{2.5}$ .

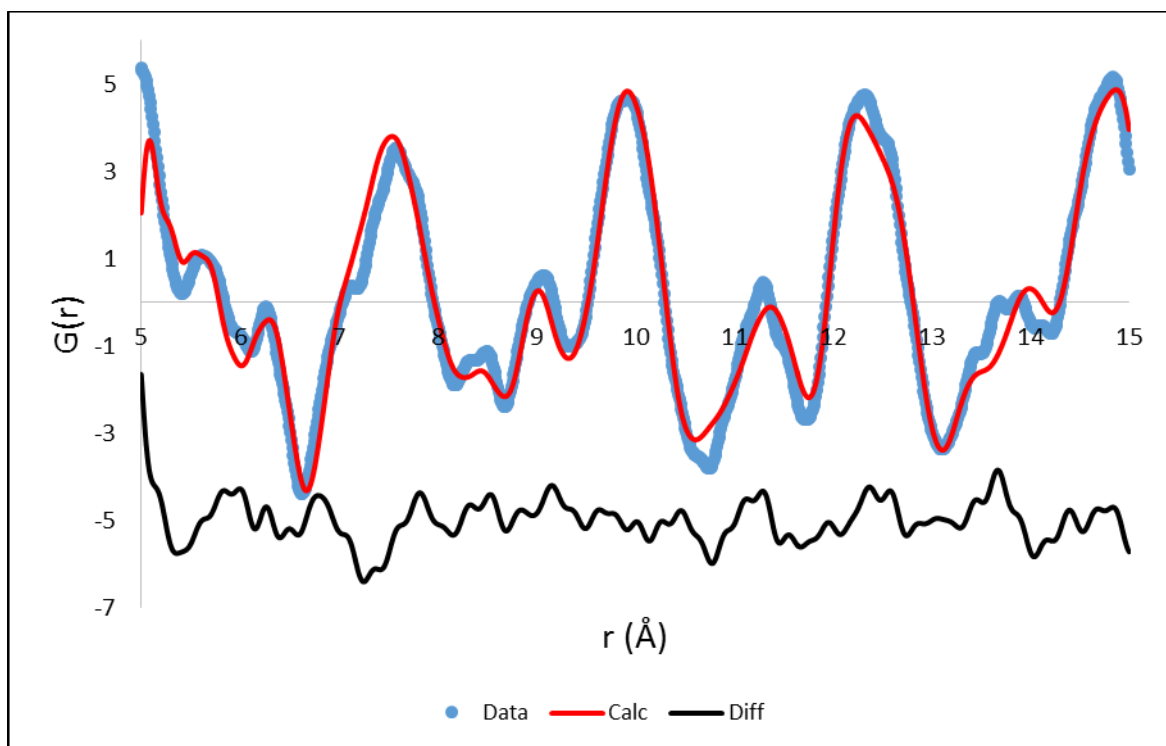

**Figure S3.** The fit to PDF of  $\text{La}_{0.5}\text{Ba}_{0.5}\text{MnO}_{2.5}$  using the average structure as a model over an  $r$ -range of 5-15  $\text{\AA}$ , showing how the fit at medium- $r$  is better than at low- $r$  but still has significant issues.

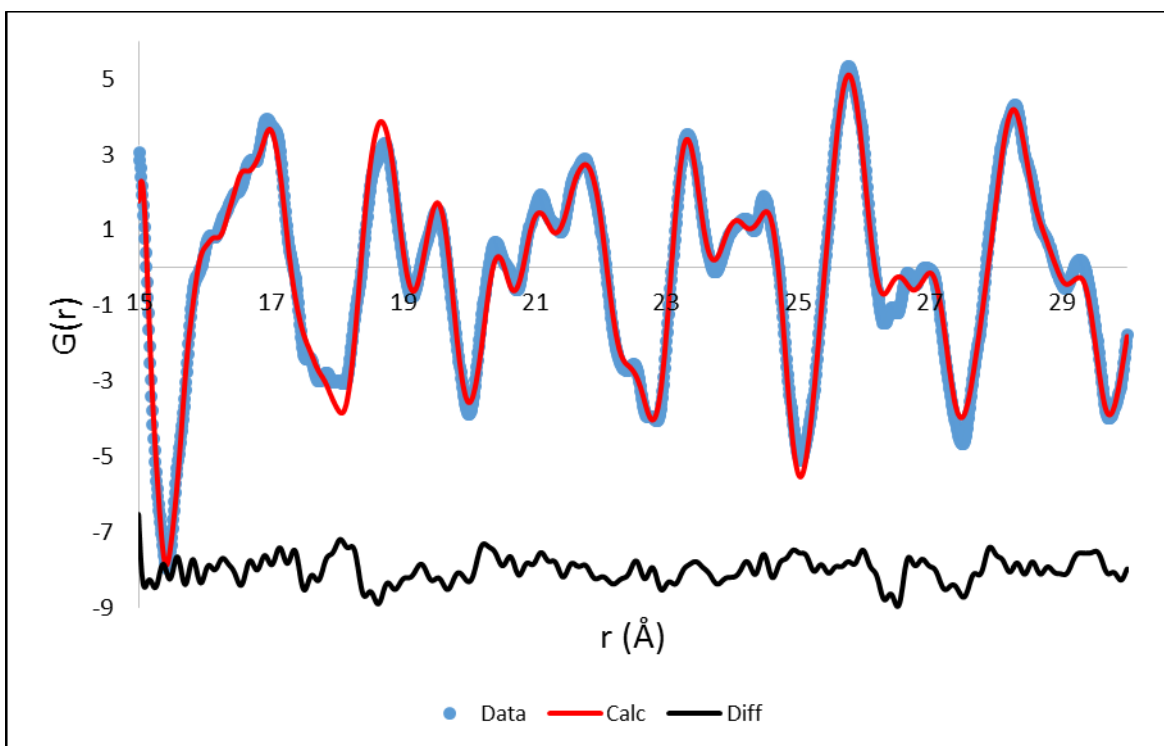

**Figure S4.** The fit to PDF of  $\text{La}_{0.5}\text{Ba}_{0.5}\text{MnO}_{2.5}$  using the average structure as a model over an  $r$ -range of 15-30  $\text{\AA}$ , showing how at longer length scales the fit becomes almost satisfactory.

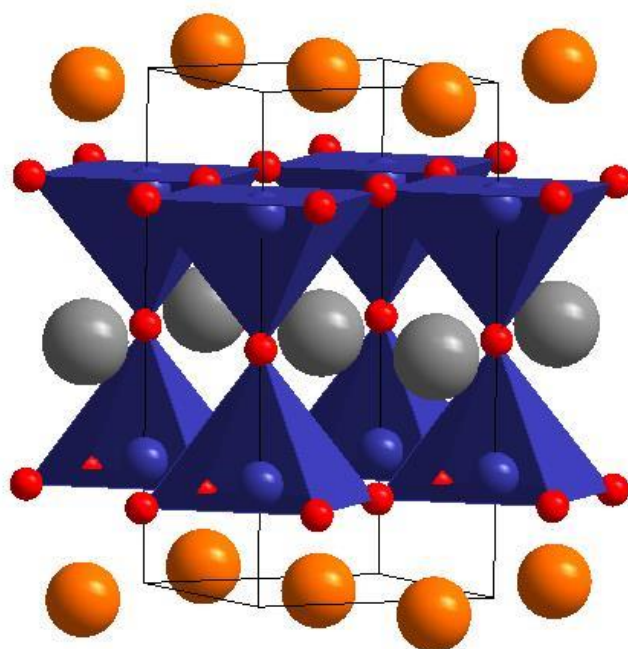

**Figure S5.** The crystal structure of the cation and anion vacancy ordered compound LaBaMn<sub>2</sub>O<sub>5</sub>. Blue atoms are Mn, red atoms are O, gray atoms are Ba, and orange atoms are La.

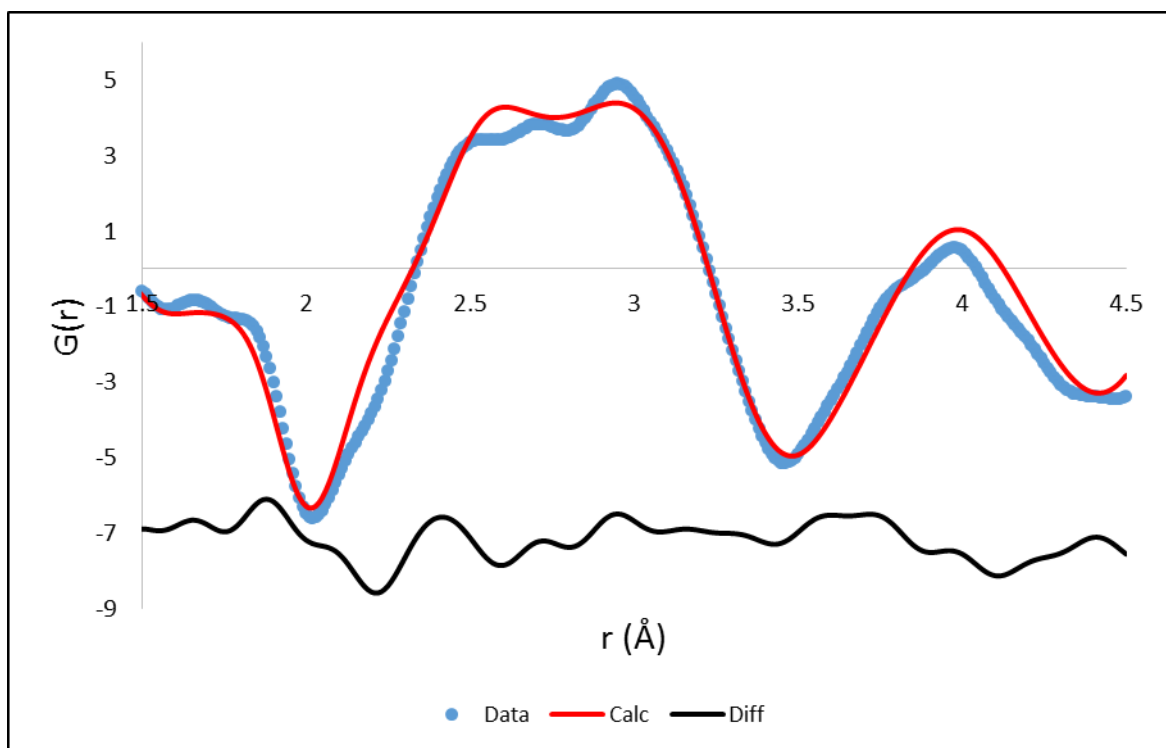

**Figure S6.** The fit to the low- $r$  region of the PDF of  $\text{La}_{0.5}\text{Ba}_{0.5}\text{MnO}_{2.5}$  using the crystal structure of  $\text{LaBaMn}_2\text{O}_5$  as a model. Notice how the first peak corresponding to Mn-O distances cannot be fit with this model, indicating that the coordination of the Mn is not exclusively or almost always square pyramidal. The fit to the higher- $r$  peaks is also somewhat poor.

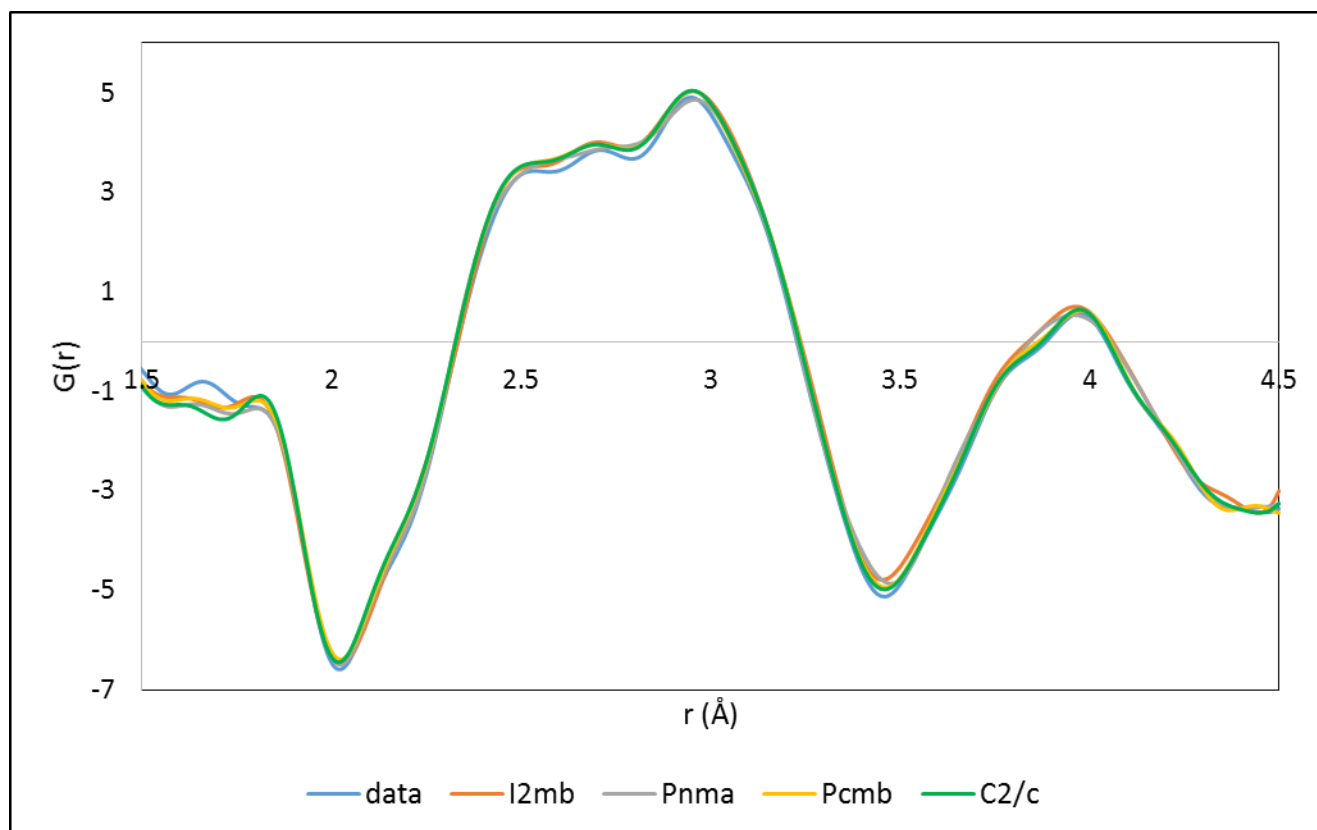

**Figure S7.** The fit to the PDF of  $\text{La}_{0.5}\text{Ba}_{0.5}\text{MnO}_{2.5}$  using four brownmillerite models with different space group symmetries. The strong overlap of all plots shows that any brownmillerite model can fit the low- $r$  data since the differences between the models do not become significant until larger  $r$ -spacing when inter-tetrahedral-chain distances appear.



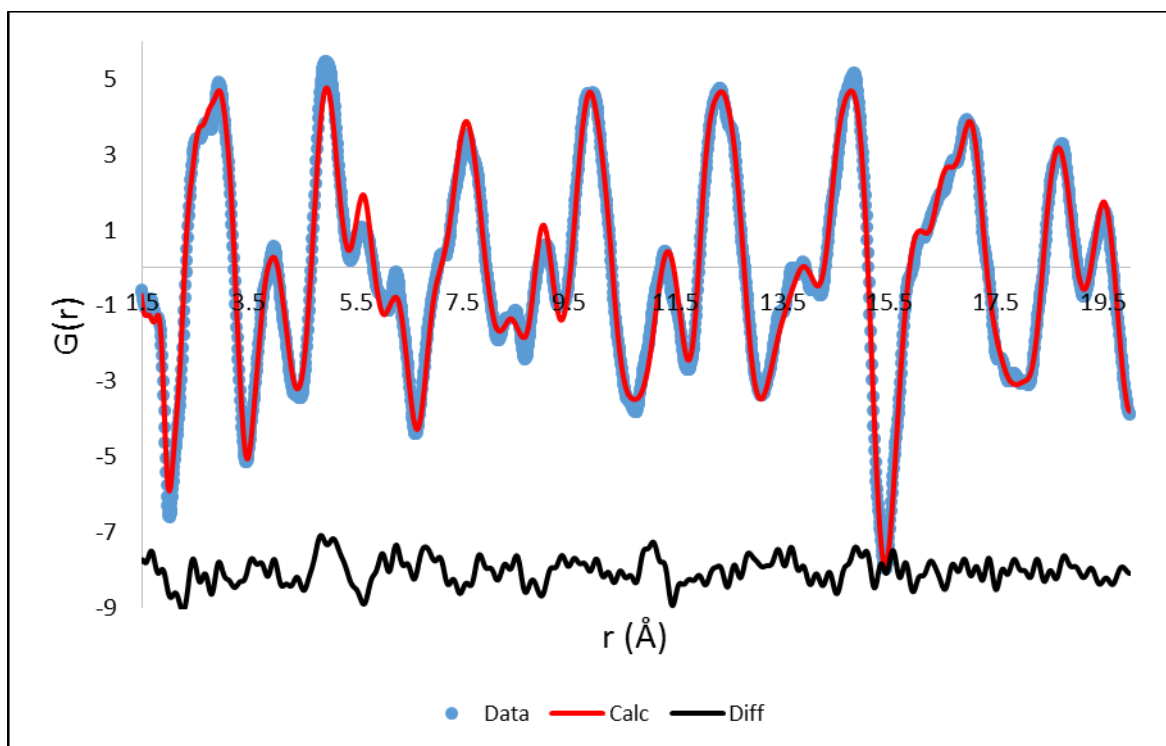

**Figure S8.** The fit to the PDF of  $\text{La}_{0.5}\text{Ba}_{0.5}\text{MnO}_{2.5}$  from 1.5 to 20 Å using a  $C2/c$  model. The fit is almost sufficient but still has significant deficiencies. Notice how the worst fit region is around distances corresponding to the first inter-layer spacing. The fits using the other brownmillerite models are similar but slightly worse.

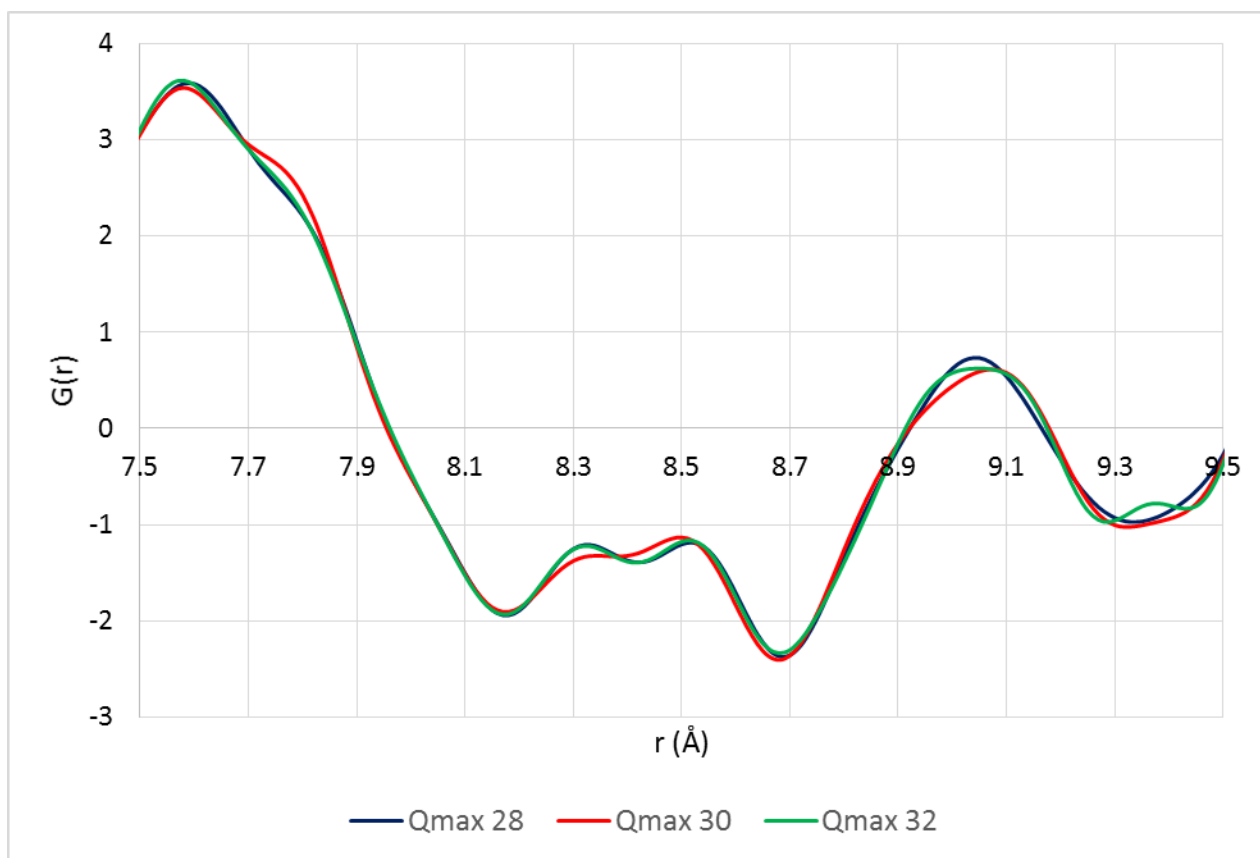

**Figure S9.** The PDF of  $\text{La}_{0.5}\text{Ba}_{0.5}\text{MnO}_{2.5}$  generated using three different  $Q_{\text{max}}$  values for the  $S(Q)$ . This demonstrates that the splitting of the small peak at  $\sim 8.4 \text{ \AA}$  is present regardless of the  $Q_{\text{max}}$  value and is therefore due to structural effects and not termination noise.

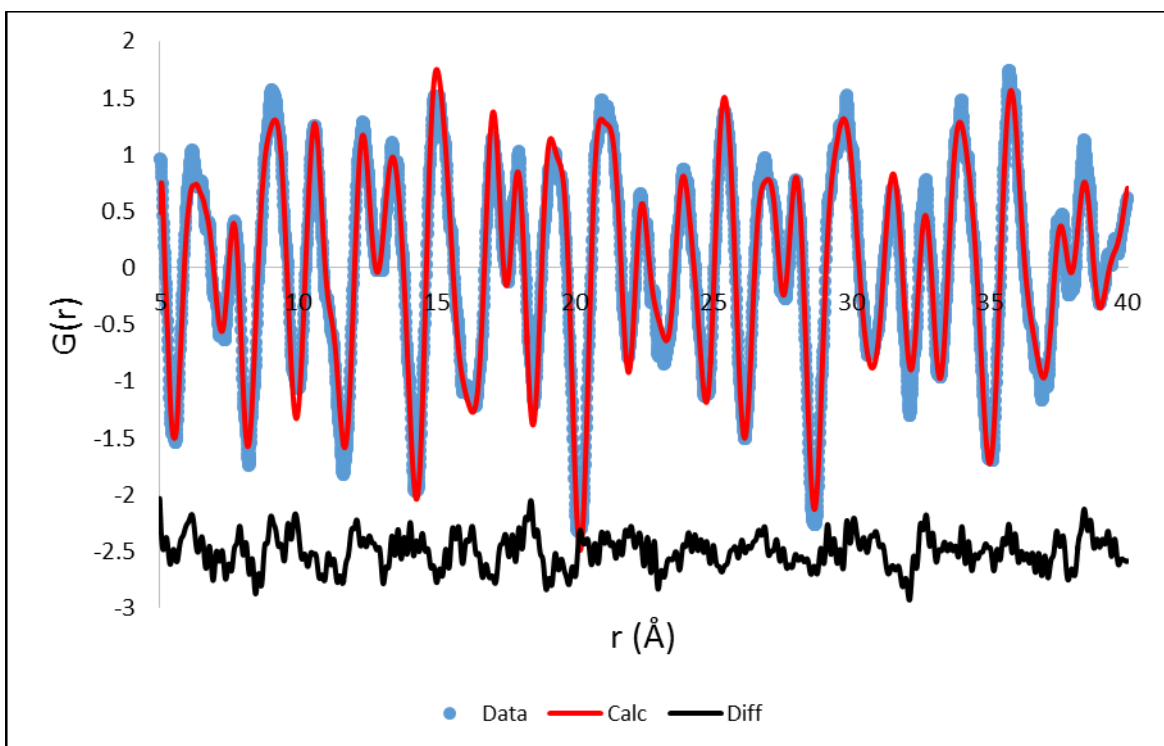

**Figure S10.** The fit to the PDF of  $\text{BaY}_{0.25}\text{Fe}_{0.75}\text{O}_{2.5}$  using the average cubic structure as a model over an  $r$ -range of 5-40  $\text{\AA}$ .

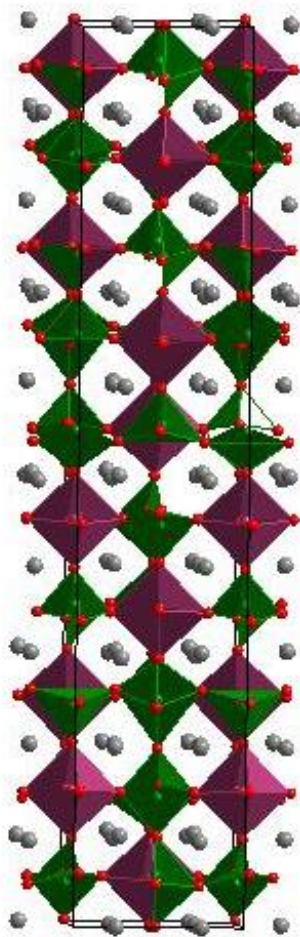

**Figure S11.** The model structure for  $\text{BaY}_{0.25}\text{Fe}_{0.75}\text{O}_{2.5}$  based on a modified  $\text{Ba}_4\text{CaFe}_3\text{O}_{9.5}$  structure. This model structure has lattice parameters of  $a = 8.19 \text{ \AA}$ ,  $b = 8.17 \text{ \AA}$ , and  $c = 43.07 \text{ \AA}$  and all angles  $90^\circ$ . The actual  $\text{Ba}_4\text{CaFe}_3\text{O}_{9.5}$  structure is based on an A-B'-D'-C-B-A'-C'-D stacking sequence and has a  $c$  lattice parameter of  $32.31 \text{ \AA}$ . In this model there are two possible stacking patterns since both A-B'-D' and A-B'-A are allowed, owing to the higher oxygen content of  $\text{BaY}_{0.25}\text{Fe}_{0.75}\text{O}_{2.5}$  ( $\text{Ba}_4\text{YFe}_3\text{O}_{10}$ ) compared to  $\text{Ba}_4\text{CaFe}_3\text{O}_{9.5}$ . This model has an extra defect stacking sequence added on to it, giving it an A-B'-A-B'-D'-C-B-A'-C'-D pattern. See reference 16 for an explanation of the stacking sequence nomenclature.
